# Supplementary material for: A novel human arterial wall-on-a-chip to study endothelial inflammation and vascular smooth muscle cell migration in early atherosclerosis
Source: Royal Society of Chemistry journal article supplement (doi:10.1039/d1lc00131k), 2021-01-01
Supplement: d1lc00131k1.pdf [file d1lc00131k1.pdf]

## Supporting Information

### **A novel human arterial wall-on-a-chip to study endothelial inflammation and vascular smooth muscle cell migration in early atherosclerosis**

*Chengxun Su<sup>1,2</sup>, Nishanth Venugopal Menon<sup>1</sup>, Xiaohan Xu<sup>1</sup>, Yu Rong Teo<sup>1</sup>, Huan Cao<sup>3</sup>, Rinkoo Dalan<sup>4,5</sup>, Chor Yong Tay<sup>3</sup>, and Han Wei Hou<sup>1,4\*</sup>*

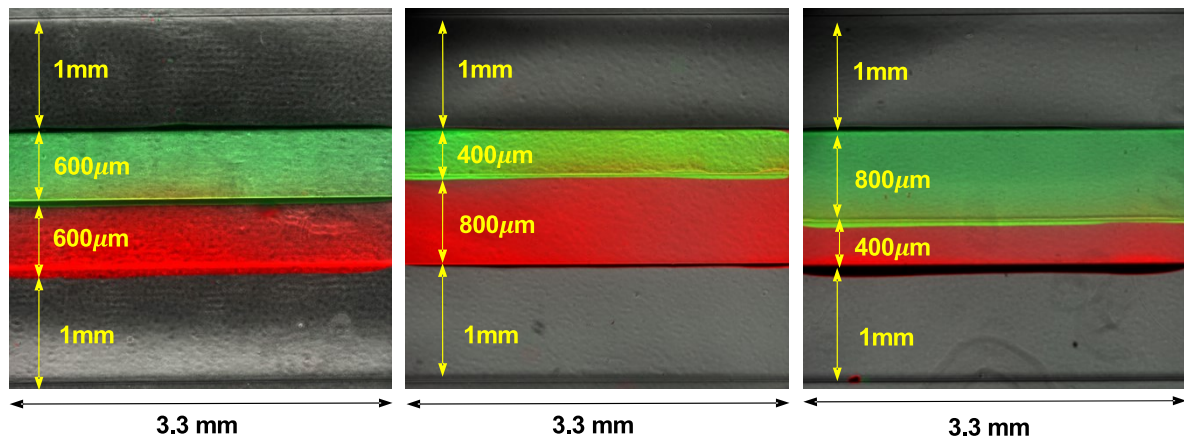

**Figure S1.** Pillar-free two-lane hydrogel confinement for devices with different channel width. Brightfield overlaid with fluorescence image of the device (top view) after gel loading. (green – first hydrogel (subendothelial layer), red – second hydrogel (SMC layer)).

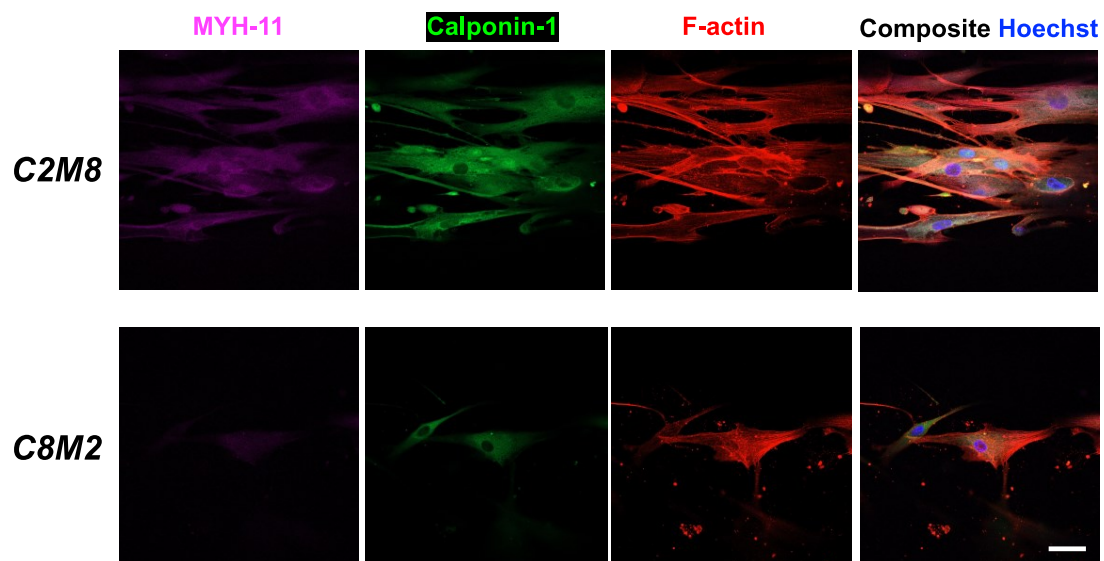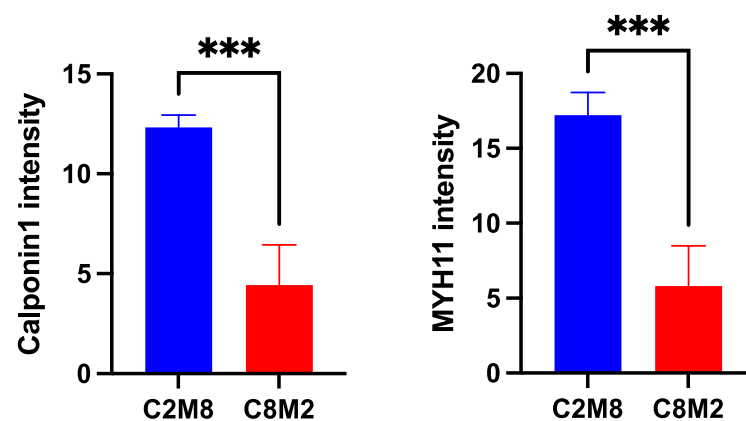

**Figure S2.** Fluorescence image and quantification of Calponin1 intensity and MYH11 intensity of SMC cultured under C2M8 and C8M2 condition. (magenta – MYH11, green – Calponin1, red – F-actin, blue – nuclei). Scale bar: 50  $\mu$ m (n = 3 chips). Results were expressed as mean  $\pm$  SD. Data were analyzed with unpaired student's t-test. (\*\*p < 0.001)

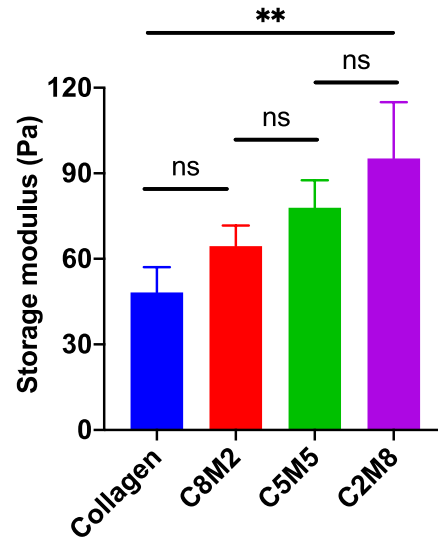

**Figure S3.** Storage modulus of collagen I, C8M2, C5M5 and C2M8 measured by rheometer (n = 3) Results were expressed as mean  $\pm$  SD. Data were analyzed with one-way ANOVA with Tukey's multiple comparisons test (\*\*p<0.01, “ns” – not significant).

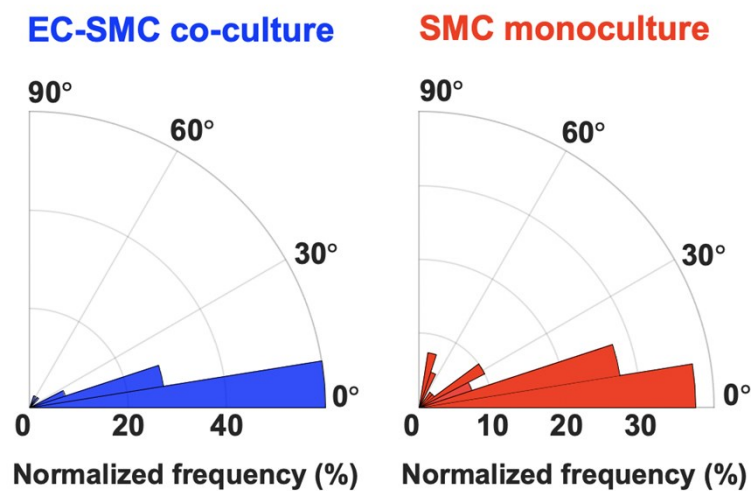

**Figure S4.** Angle orientation distribution of co-cultured SMC (non-migrated) and monocultured SMC (non-migrated) at day 3 (~40-50 cell measurements from n=3 chips from 3 independent experiments).

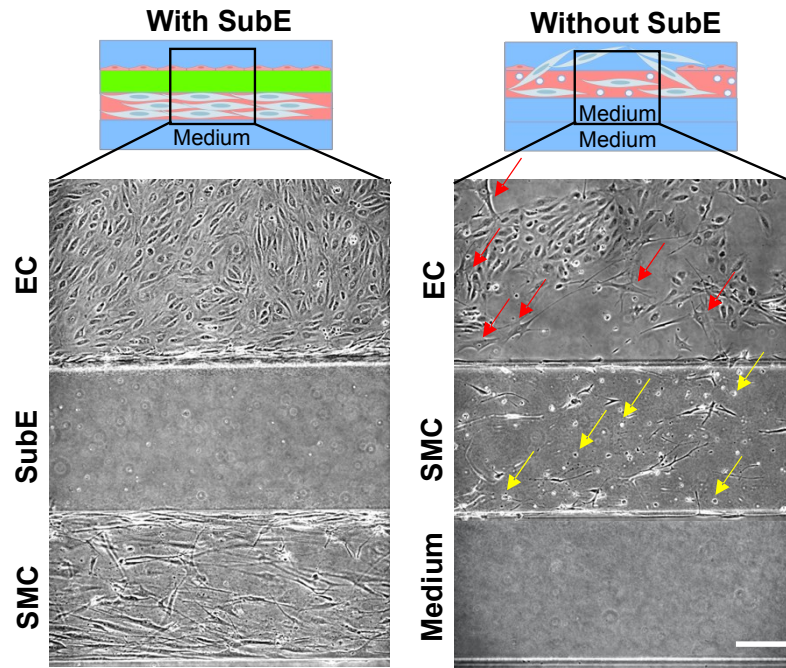

**Figure S5.** Brightfield image of EC-SMC co-culture with subendothelial layer (left) and without subendothelial layer (right) at day 5. Red arrow indicates SMC that migrated into the EC channel; yellow arrow indicates SMC that remained rounded-up. Scale bar: 200  $\mu\text{m}$ .

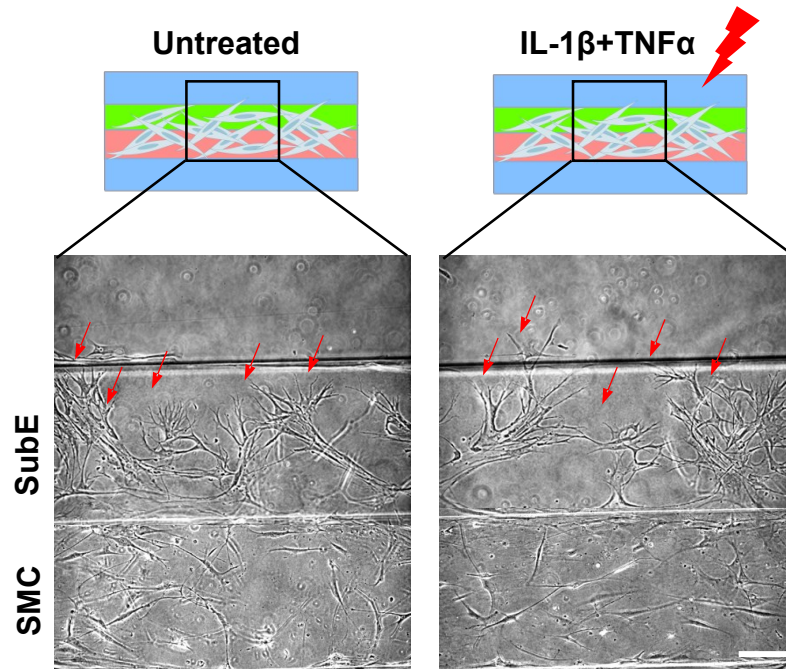

**Figure S6.** Inflammatory cytokine treatment on SMC monoculture. Brightfield image of untreated SMC monoculture (left) and IL-1 $\beta$  (1 ng/ml) + TNF $\alpha$  (1 ng/ml) treated SMC monoculture (right) at day 5. Red arrow indicates migrated SMC. Scale bar: 200  $\mu\text{m}$ .

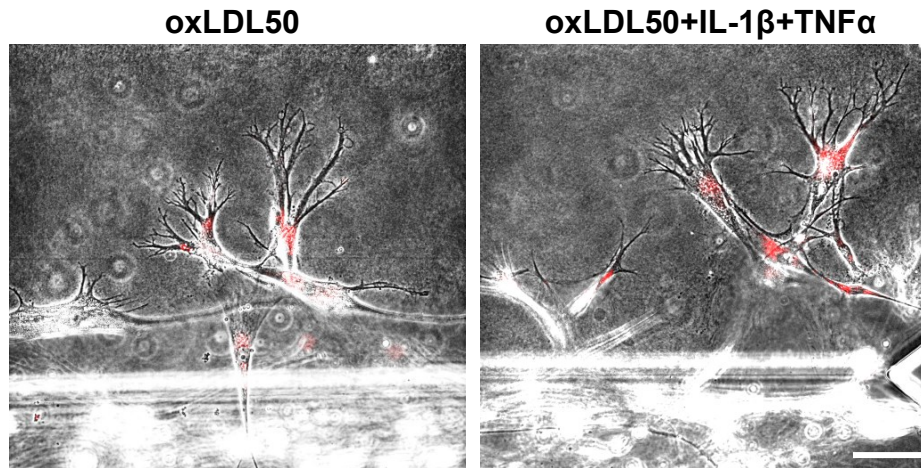

**Figure S7.** Representative fluorescence overlaid with brightfield image of oxLDL uptake by migrated SMC for chips treated with Dil-oxLDL (50  $\mu\text{g/ml}$ ) (left), and Dil-oxLDL (50  $\mu\text{g/ml}$ ) + IL-1 $\beta$  (1 ng/ml) + TNF $\alpha$  (1 ng/ml) (right) at day 5. Scale bar: 100  $\mu\text{m}$ .

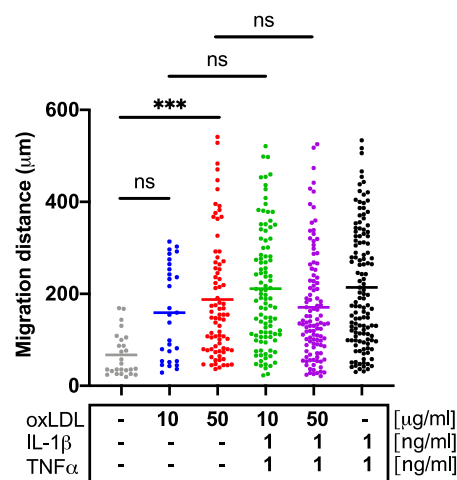

**Figure S8.** SMC migration distance into subendothelial layer for hyperlipidemia study ( $n = 3$  chips). Results were expressed as scatter plot with a line at mean. Data were analyzed with one-way ANOVA with Tukey's multiple comparisons test (\*\*\* $p < 0.001$ , “ns” – not significant).



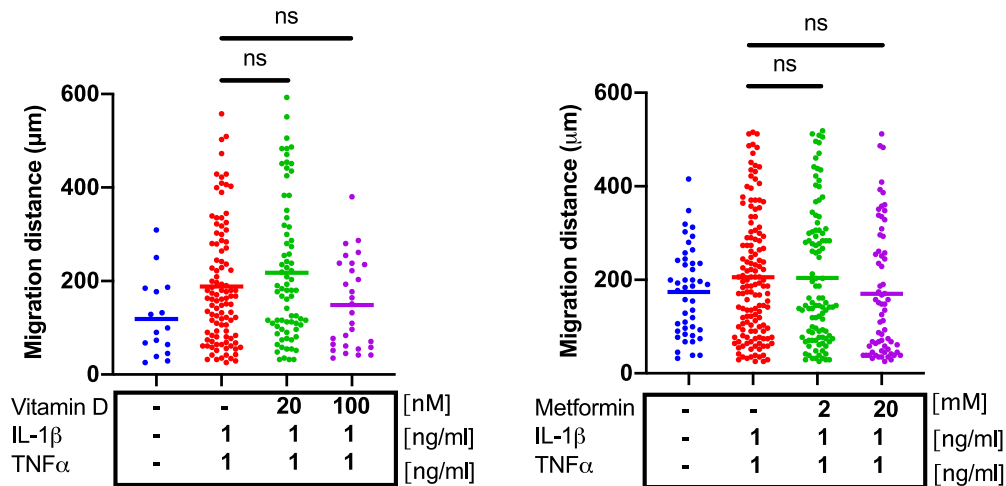

**Figure S9.** SMC migration distance into subendothelial layer for Vitamin D and Metformin studies ( $n = 4$  chips). Results were expressed as scatter plot with a line at mean. Data were analyzed with one-way ANOVA with Tukey's multiple comparisons test ("ns" – not significant).

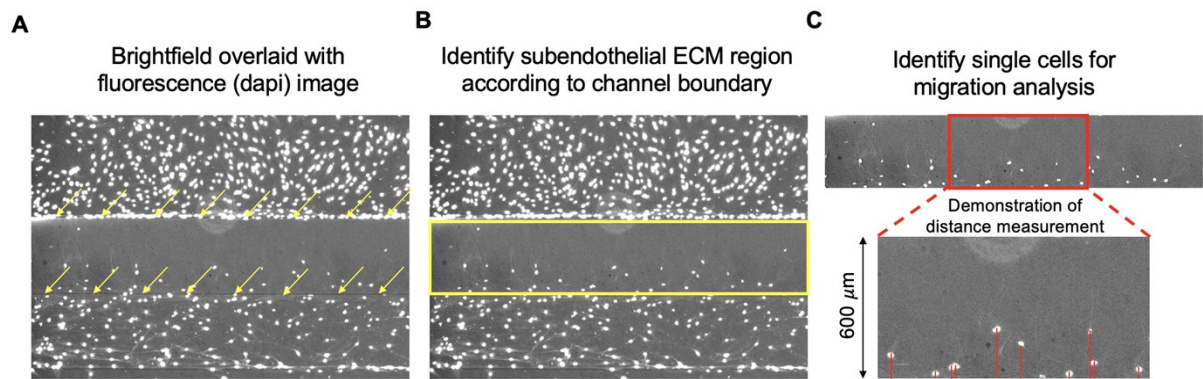

**Figure S10.** On-chip analysis of SMC migration. (A) Overlaid brightfield with fluorescence image of the chip. Cells were stained with Hoechst for nuclei visualization. Yellow arrows indicate the channel boundary of the subendothelial ECM region. (B) Identification of the subendothelial ECM region according to channel boundary. Yellow box indicates the subendothelial ECM region. (C) Identification and quantification of single SMC migration in the subendothelial ECM region. Red box indicates a magnified region to measure cell migrated distances (red lines).
